# Supplementary material
Source: publisher figshare collection journal article supplement (https://sage.figshare.com/ndownloader/files/14625554)
Supplement: Supplementary file 1 [file 14625554]

## Appendix 6: MHF Carer's Checklist Results

| Case No & Patient Reference | Type of Dementia                                | Frailty Score | Frequency of Problems /60                                   | How Stressful /60 | Burden /25 |
|-----------------------------|-------------------------------------------------|---------------|-------------------------------------------------------------|-------------------|------------|
|                             |                                                 |               | Scores Pre Intervention Assessment                          |                   |            |
| 1 A&B                       | Alzheimer's Disease                             | 7             | 40                                                          | 34                | 20         |
|                             |                                                 |               | Scores at First Post Intervention Assessment (9 to 14 days) |                   |            |
|                             |                                                 |               | 34                                                          | 18                | 21         |
|                             |                                                 |               | Scores at Second Post Intervention Assessment (3 months)    |                   |            |
|                             |                                                 |               | 37                                                          | 32                | 23         |
|                             |                                                 |               | Scores Pre Intervention Assessment                          |                   |            |
| 2 C&D                       | Vascular Dementia                               | 6             | 16                                                          | 17                | 12         |
|                             |                                                 |               | Scores at First Post Intervention Assessment (9 to 14 days) |                   |            |
|                             |                                                 |               | 18                                                          | 20                | 15         |
|                             |                                                 |               | Scores at Second Post Intervention Assessment (3 months)    |                   |            |
|                             |                                                 |               | 21                                                          | 19                | 17         |
|                             |                                                 |               | Scores Pre Intervention Assessment                          |                   |            |
| 3 E&F                       | Parkinson's Disease + dementia symptoms         | 6             | 35                                                          | 33                | 23         |
|                             |                                                 |               | Scores at First Post Intervention Assessment (9 to 14 days) |                   |            |
|                             |                                                 |               | 33                                                          | 42                | 23         |
|                             |                                                 |               | Scores at Second Post Intervention Assessment (3 months)    |                   |            |
|                             |                                                 |               | 32                                                          | 40                | 23         |
|                             |                                                 |               | Scores Pre Intervention Assessment                          |                   |            |
| 4 G&H                       | Frontal Lobe Dementia                           | 6             | 38                                                          | 34                | 18         |
|                             |                                                 |               | Scores at First Post Intervention Assessment (9 to 14 days) |                   |            |
|                             |                                                 |               | 44                                                          | 35                | 18         |
|                             |                                                 |               | Scores at Second Post Intervention Assessment (3 months)    |                   |            |
|                             |                                                 |               | 38                                                          | 18                | 17         |
|                             |                                                 |               | Scores Pre Intervention Assessment                          |                   |            |
| 5 J&K                       | Radiation Dementia - from proton beam treatment | 5/6           | 30                                                          | 21                | 20         |
|                             |                                                 |               | Scores at First Post Intervention Assessment (9 to 14 days) |                   |            |
|                             |                                                 |               | 24                                                          | 22                | 18         |
|                             |                                                 |               | Scores at Second Post Intervention Assessment (3 months)    |                   |            |
|                             |                                                 |               | 32                                                          | 29                | 22         |
|                             |                                                 |               | Scores Pre Intervention Assessment                          |                   |            |
| 6 L&M                       | Mixed - Vascular Dementia & Alzheimer's Disease | 6/7           | 29                                                          | 22                | 19         |
|                             |                                                 |               | Scores at First Post Intervention Assessment (9 to 14 days) |                   |            |
|                             |                                                 |               | 30                                                          | 15                | 13         |
|                             |                                                 |               | Scores at Second Post Intervention Assessment (3 months)    |                   |            |
|                             |                                                 |               | 30                                                          | 15                | 16         |
|                             |                                                 |               | Scores Pre Intervention Assessment                          |                   |            |
| 7 N&P                       | Vascular Dementia                               | 6/7           | 31                                                          | 26                | 20         |
|                             |                                                 |               | Scores at First Post Intervention Assessment (9 to 14 days) |                   |            |
|                             |                                                 |               | 31                                                          | 14                | 19         |
|                             |                                                 |               | Scores at Second Post Intervention Assessment (3 months)    |                   |            |
|                             |                                                 |               | N/A                                                         | N/A               | N/A        |
|                             |                                                 |               | Scores Pre Intervention Assessment                          |                   |            |
| 8 Q&R                       | Alzheimer's Disease                             | 6             | 22                                                          | 13                | 21         |

## **Appendix 6: MHF Carer's Checklist Results**
